# Supplementary material
Source: publisher figshare collection journal article supplement (https://karger.figshare.com/ndownloader/files/13346609)
Supplement: Supplementary file 1 [file 13346609]

## **Supplementary Material**

# **Downregulation of N-Acetylglucosaminyltransferase GCNT3 by miR-302b-3p Decreases Non-Small Cell Lung Cancer (NSCLC) Cell Proliferation, Migration and Invasion**

Qian Li<sup>a,b</sup> Pengzhan Ran<sup>a</sup> Xiyu Zhang<sup>a</sup> Xiaopeng Guo<sup>a</sup> Yuncang Yuan<sup>a</sup>  
Tianqi Dong<sup>a</sup> Bei Zhu<sup>a</sup> Shangyong Zheng<sup>a</sup> Chunjie Xiao<sup>a</sup>

<sup>a</sup>School of Medicine, Yunnan University, Kunming, <sup>b</sup>Transfusion Medicine Research Department, Yunnan University, Kunming, China

Figure S1

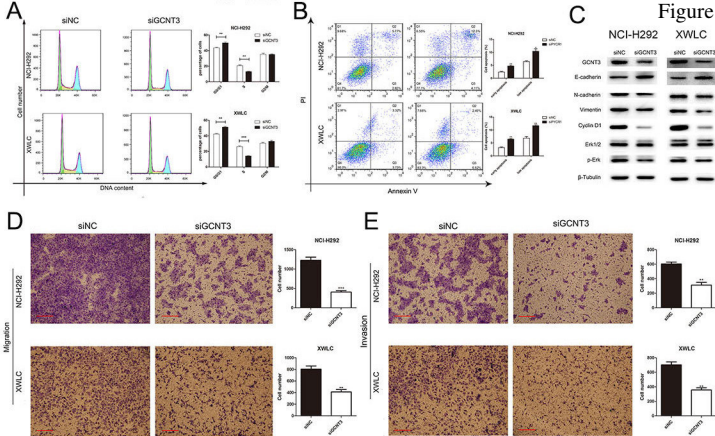

A

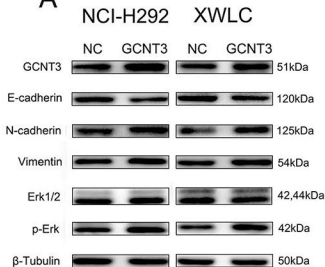

B

NCI-H292

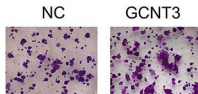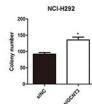

C

XWLC

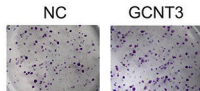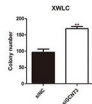

D

NC

GCNT3

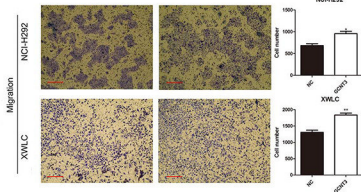

E

NC

GCNT3

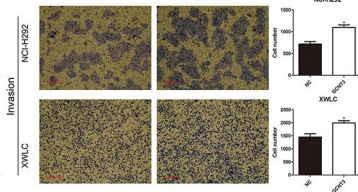

A

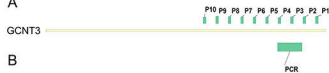

B

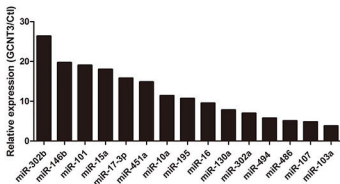

C

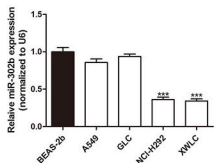

D

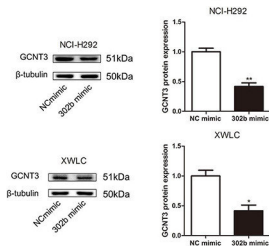

E

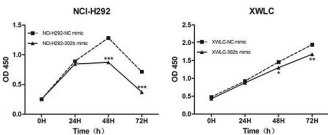

F

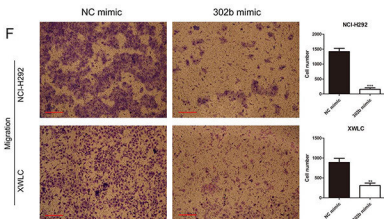

G

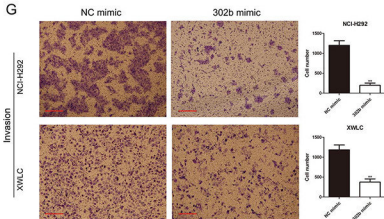

A

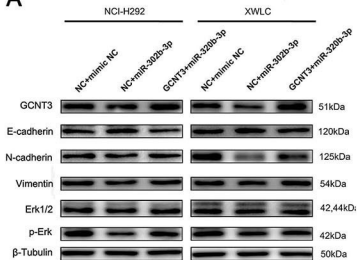

B

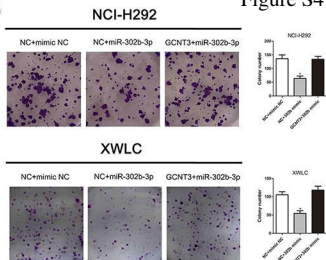

C

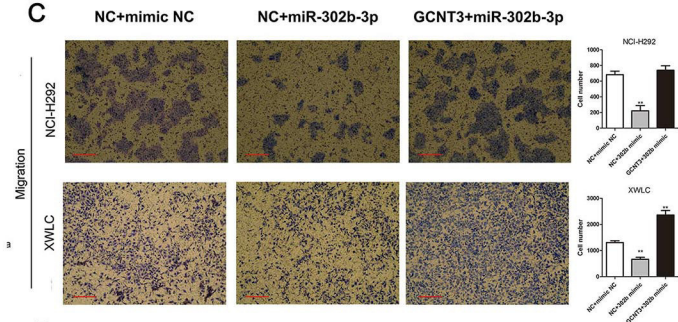

D

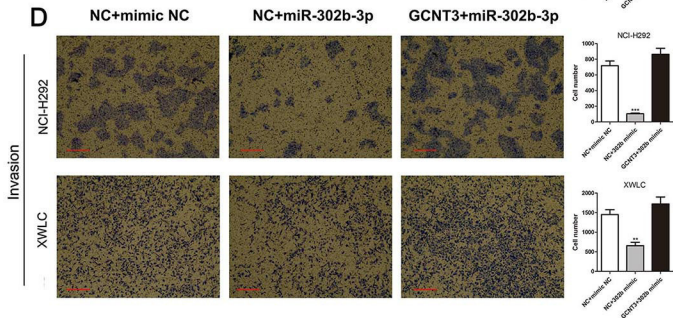

1 **Figure S1. GCNT3 knockdown inhibited NSCLC cell migration, invasion and induced cell**  
2 **cycle arrest and apoptosis. (A)** The cell cycle progression of XWLC and NCI-H292 cell  
3 transfected with si-GCNT3 or siNC were measured by flow cytometry assay using PI staining. The  
4 bar chart represented the percentage of cell in G0/G1, S, or G2/M phase, as indicated. **(B)** Cell  
5 apoptosis of XWLC and NCI-H292 cell lines transfected with siGCNT3 or siNC was measured by  
6 Annexin V-PI double staining followed by flow cytometry analysis. **(C)** Western blotting assay  
7 detected E-cadherin, N-cadherin, Vimentin, Cyclin D1, Erk and p-Erk expression after GCNT3  
8 knockdown in NSCLC cell, and  $\beta$ -Tubulin was used as the loading control. **(D, E)** Migration and  
9 invasion of XWLC and NCI-H292 cell lines transfected with siGCNT3 or siNC were measured by  
10 transwell assay after 48h. For invasion assay, the upper chamber was pre-coated with Matrigel. The  
11 cell was photographed and counted under a microscope in randomly selected fields. All data was  
12 presented as the mean  $\pm$  standard error of experiments performed in triplicate, and comparisons  
13 between groups were performed using *t*-tests. (\* $P < 0.05$ ; \*\* $P < 0.01$ ; \*\*\* $P < 0.001$ ; Scale bar: 250  
14  $\mu\text{m}$ )

15

16 **Figure S2. GCNT3 overexpression promoted NSCLC cell proliferation, migration and**  
17 **invasion. (A)** Western blotting assay detected E-cadherin, N-cadherin, Vimentin, Erk and p-Erk  
18 expression after GCNT3 overexpression in NSCLC cells, and  $\beta$ -Tubulin was used as the loading  
19 control. **(B, C)** Colony-forming assays were used to detect the proliferation of GCNT3-vector-  
20 transfected XWLC and NCI-H292 cells. All data was presented as the mean  $\pm$  standard error of  
21 experiments performed in triplicate, and comparisons between groups were performed using *t*-tests.  
22 **(D, E)** Migration and invasion of XWLC and NCI-H292 cell lines transfected with GCNT3-vector

or NC were measured by transwell assay after 48h. For invasion assay, the upper chamber was pre-coated with Matrigel. The cells were photographed and counted under a microscope in randomly selected fields. Data was presented as mean  $\pm$  SD based on at least three repeated experiments. (\* $P$  < 0.05; \*\* $P$  < 0.01; \*\*\* $P$  < 0.001; Scale bar: 250  $\mu$ m)

**Figure S3. GCNT3 was the target of miR-302b-3p, and miR-302b-3p overexpression inhibited NSCLC cell proliferation, migration, invasion. (A)** GCNT3 mRNA, probe binding sites and region analyzed by qRT-PCR. **(B)** qRT-PCR of multiplex miRNA data of GCNT3 probe affinity purification in XWLC cell. Shown data were normalized values for the enriched miRNAs (>3 fold). **(C)** Real-time RT-PCR analyzed miR-302b-3p expression in four human NSCLC cell lines (A549, GLC, XWLC and NCI-H292) and a human Normal pulmonary epithelial cell line (BEAS-2B). **(D)** Western blot determined GCNT3 expression after miR-302b-3p upregulated.  $\beta$ -Tubulin was used as the loading control. **(E)** CCK8 assay was performed to measure the proliferation of XWLC and NCI-H292 cell lines at 0, 24, 48 and 72 h after miR-302b-3p mimic or NC mimic (control) transfection. **(F, G)** Migration and invasion of XWLC and NCI-H292 cell lines transfected with miR-302b-3p mimic or NC mimic were measured by transwell assay after 48h. For invasion assay, the upper chamber was pre-coated with Matrigel. The cell were photographed and counted under a microscope in randomly selected fields. All data was presented as the mean  $\pm$  standard error of experiments performed in triplicate, and comparisons between groups were performed using t-tests. (\* $P$  < 0.05; \*\* $P$  < 0.01; \*\*\* $P$  < 0.001; Scale bar: 250  $\mu$ m)

**Figure S4. miR-302b-3p inhibited NSCLC cell proliferation, migration and invasion in a**

**GCNT3-dependent manner. (A)** Western blotting assay detected E-cadherin, N-cadherin, Vimentin, Erk and p-Erk expression after NSCLC cell transfected with miR-302-3p alone or GCNT3 vector and miR-302b-3p in combination, and  $\beta$ -Tubulin was used as the loading control. **(B)** Colony-forming assays was used to detect the proliferation of XWLC and NCI-H292 cells transfected with miR-302b-3p alone or GCNT3 vector and miR-302b-3p in combination. Data were based on at least 3 independent experiments, and shown as mean  $\pm$  SD. **(C, D)** Migration and invasion of XWLC and NCI-H292 cell lines transfected with miR-302b-3p alone or GCNT3 vector and miR-302b-3p in combination were measured by transwell assay after 48h. For invasion assay, the upper chamber was pre-coated with Matrigel. The cells were photographed and counted under a microscope in randomly selected fields. All data was presented as the mean  $\pm$  standard error of experiments performed in triplicate, and comparisons between groups were performed using t-tests. (\* $P < 0.05$ ; \*\* $P < 0.01$ ; \*\*\* $P < 0.001$ ; Scale bar: 250  $\mu$ m)
